# Supplementary material
Source: Elsevier journal article supplement (https://comptes-rendus.academie-sciences.fr/chimie/article/10.1016/j.crci.2008.10.010/file/attach/mmc3.pdf)
Supplement: mmc3 [file mmc3.pdf]

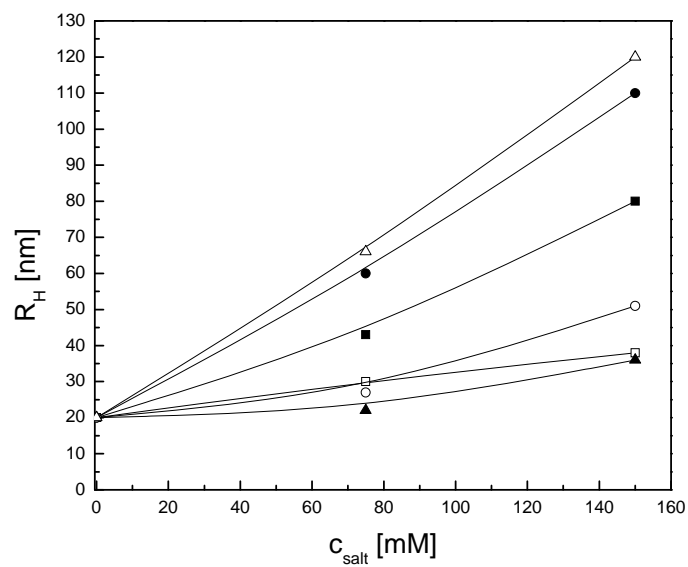

**Figure S3:** The effect of various cations / chloride salts on the growth of the hydrodynamic radii  $R_H$  of the cationic aggregates in SL / DTAB systems: NaOAc (▲),  $\text{Na}_2\text{SO}_4$  (□), NaCl (○),  $\text{NaNO}_3$  (■), NaBr (●) and NaSCN (Δ).
